# Supplementary material
Source: PubMed Central journal article supplement (PMC2692987)

## “Supplemental Material”

### MATERIALS AND METHODS

*Cell culture and reagents.* Primary rat aortic SMCs grown in a 50:50 mixture of DMEM and F12 media supplemented with 10% fetal bovine serum and the antibiotics penicillin and streptomycin. Cells were growth arrested at confluency for 3 days to induce the expression of smooth muscle contractile genes and promote a differentiated phenotype. To test for the effect of matrix composition, cell culture plates were coated with Coll I (20 µg/ml; Sigma) or Coll IV (20 µg/ml; Chemicon and Trevigen) overnight at 4°C. Plates were then washed with serum free media, and rat aortic SMCs were plated in serum free media at near confluence ( $3 \times 10^4$  cells/cm<sup>2</sup>) for the indicated time depending upon the experimental readout. In some experiments, the inhibitors SN50 (Axxora, 30 µg/ml), cyclosporine A (Sigma, 10 µM), or A-285222 (a gift from Abbott Pharmaceuticals, 10 µM) were given for 1 hour prior to experiment initiation to inhibit NF-κB and NFAT signaling, respectively.

*Luciferase Assays.* SMCs were transfected (FuGene 6) with promoter-reporter (luciferase) constructs at 70% confluency containing the smooth muscle myosin heavy chain promoter (SMMHC-luc), SM alpha actin promoter (SMaA-luc), VCAM-1 promoter (VCAM-1-luc), VCAM-1 promoter with a mutated NFκB/NFAT site (mutVCAM-1-luc), NFATc binding elements (NFATc-luc, Conetech), or SMA promoter containing point mutations in the CARG A, CARG B, or intronic CARG sequence. SMCs were grown to confluency on plastic and then growth arrested for 24-36 hrs. SMCs were then trypsinized and replated onto Coll I or Coll IV for the denoted time and luciferase assay performed.

*Quantitative RT-PCR.* Total RNA was extracted with TRIzol reagent (Invitrogen), and cDNAs were produced with the BioRad iScript cDNA Synthesis kit per manufacturer's instructions. To quantify the mRNA, real-time PCR was performed using a BioRad iCycler and the Sybr green visualization dye. All results were normalized to 18S and are expressed as a ratio of target mRNA to 18S mRNA.

*Western blotting.* Cell lysis and immunoblotting were performed to measure protein expression and posttranslational modification. Briefly, cells were lysed directly in SDS Sample buffer, separated by SDS-PAGE gels, and transferred to a PVDF membrane. The membrane were analyzed by western blotting with mouse anti-SM α-actin (Sigma; 1:5000), goat anti-VCAM (Santa Cruz Biotechnology, 1:500), and rabbit anti-ERK (Santa Cruz Biotechnology; 1:5000). Resulting bands were scanned to tiff files, and band intensity was determined using ImageJ.

*Chromatin Immunoprecipitation.* Real-time PCR was performed on 1 ng genomic DNA from CHIP. Real-time PCR primers were designed to flank the 5'-CARG elements of SMα-actin and SMMHC, the c-fos CARG. Quantification of protein:DNA interaction/enrichment was determined by the following  $2^{Ct(Ref)-Ct(IP)} \cdot 2^{Ct(Ref)-Ct(No\ antibody\ control)}$ .

Primer sequences were as follows: *SM  $\alpha$ -actin* 5-agcagaacagaggaatgcagtggaagagac-3., 5-cctcccactcgctcccaacaaggagc-3; *SMMHC* 5.-ctgcgcgggacatatttagtcagggggag-3, 5-ctgggcgggagacaacccaaaaggccagg-3

## SUPPLEMENTAL DATA

**Figure S1. NF- $\kappa$ B localization and phosphorylation are not differentially regulated by Coll I and Coll IV.** (A) SMC plating times on Coll I or Coll IV were varied at 24h, 48h, or 5 days, and phosphorylation of the NF- $\kappa$ B p65 subunit was determined using a phosphorylation site-specific antibody. A representative image is shown. n = 3. (B) SMC plating times on Coll I or Coll IV were varied at 2h, 6h, 12h, 24h, 48h, or 5 days. Cells were fixed in formaldehyde and nuclear translocation of the NF- $\kappa$ B p65 subunit was determined by immunocytochemistry. Representative images are shown. n = 3.

**Figure S2. SN50 reduces IL-1 $\beta$ -induced VCAM-1 expression.** SMCs were plated onto Coll IV and some cells were treated with the NF- $\kappa$ B inhibitor SN50 for 1 hour. Cells were then treated for 24 hours with IL-1 $\beta$  (5  $\mu$ g/ml). VCAM-1 expression was assessed by Western Blotting as previously described. n = 3 duplicate experiments. \* p < 0.001.

**Figure S3. Coll I and Coll IV do not differentially regulate p38.** SMC plating times on Coll I or Coll IV were varied at 24h, 48h, or 5 days, and phosphorylation of p38 was determined using a phosphorylation site-specific antibody. A representative image is shown. n = 3.

**Figure S1**

**“Supplemental Material”**

**A.**

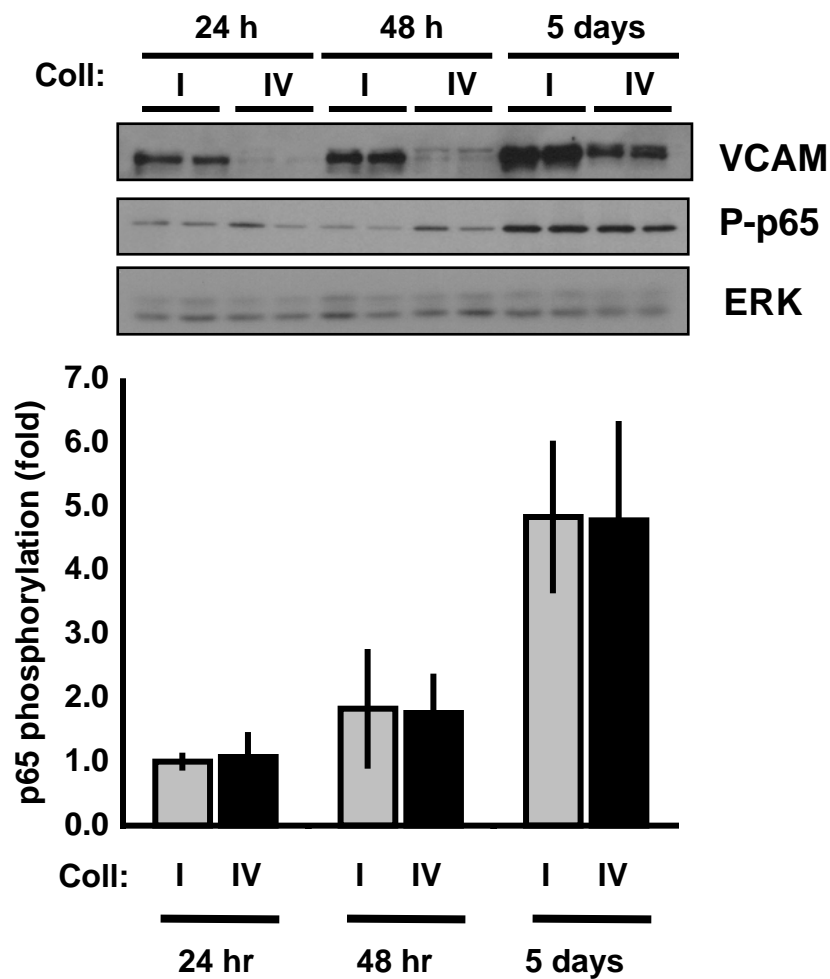

**B.**

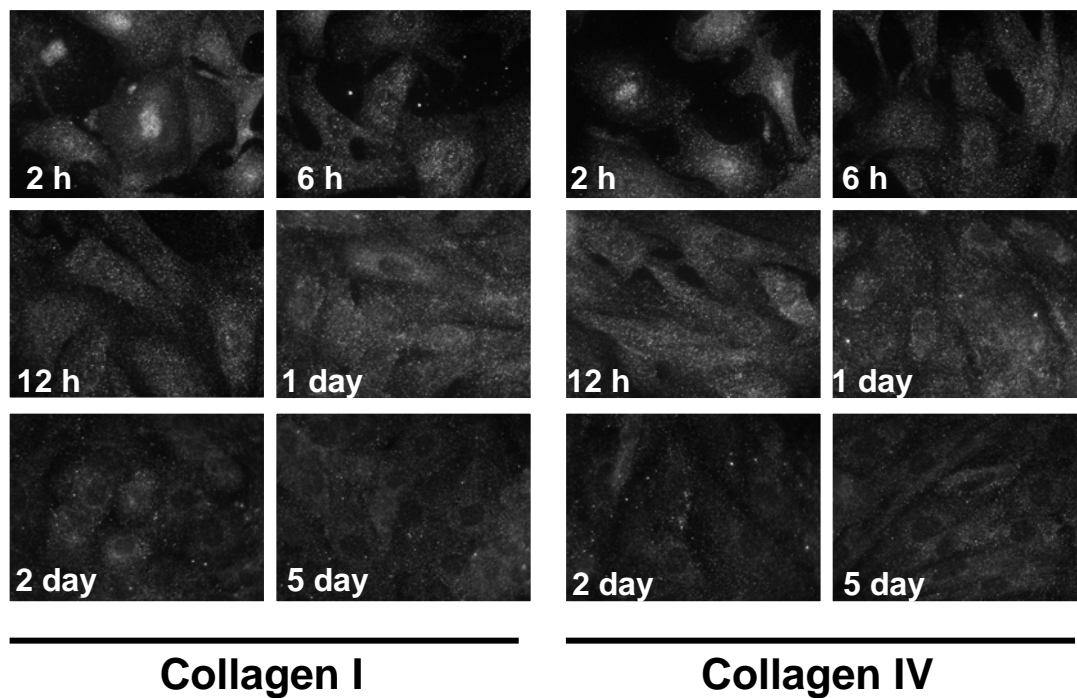

**Figure S2**

**“Supplemental Material”**

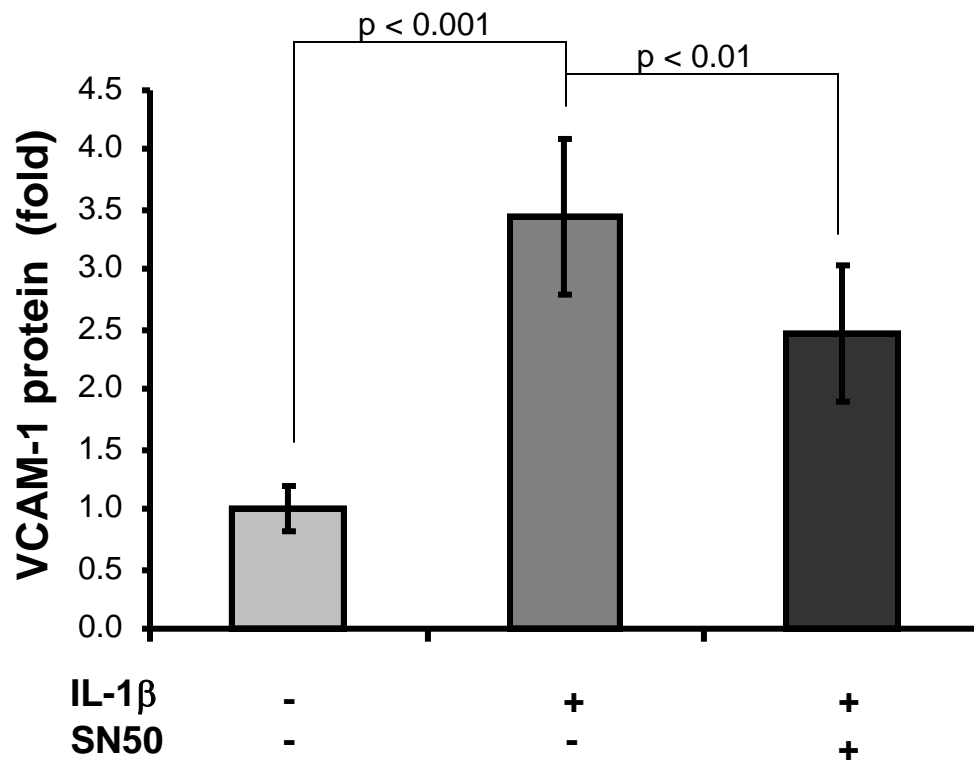

**Figure S3**

**“Supplemental Material”**

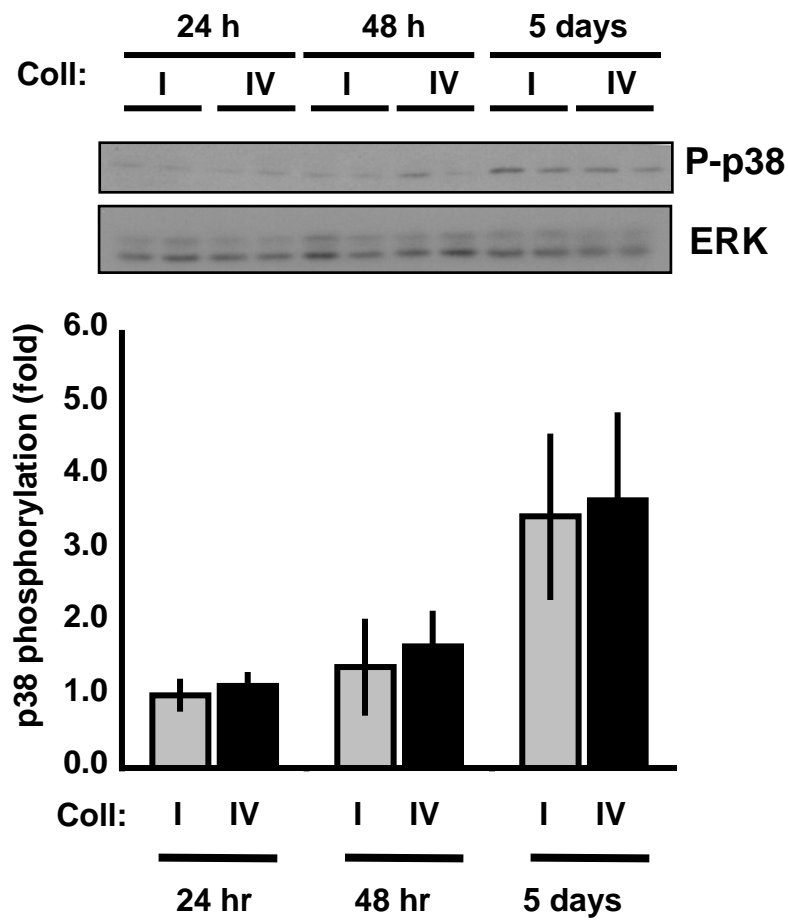

Supplement: NIHMS110216-supplement-supplement_1.pdf [file NIHMS110216-supplement-supplement_1.pdf]
